# Supplementary material for: bMERB domains are bivalent Rab8 family effectors evolved by gene duplication
Source: eLife journal article supplement (doi:10.7554/elife.18675), 2016-08-23
Supplement: supp [file elife_poa_e18675_Figure_6_figure_supplement_3.pdf › elife_poa_e18675_Figure_6_figure_supplement_3.pdf]

-----<XXXXXXXXXXXXX α-helix 1 XXXXXXXXXXXXXXXX>-----

|                              |      |                                                               |      |
|------------------------------|------|---------------------------------------------------------------|------|
| MicalcL <sub>525-695</sub>   | 525  | GHMLEKAMKQLVKQEELKRLYK-----AQAIQRQLEEVVEERQRASEIQGVRLEKALR--G | 574  |
| MicalcL <sub>534-683</sub>   | 534  | GHM-----KQEELKRLYK-----AQAIQRQLEEVVEERQRASEIQGVRLEKALR--G     | 574  |
| Mical3 <sub>1841-1990</sub>  | 1841 | G-----KQEELKRLHR-----AQIIQRQLQQVVEERQRRLVEERGVAVEKALR--G      | 1881 |
| Mical1 <sub>918-1067</sub>   | 918  | GHM-----KEEEMKRFCK-----AQTIQRRLNEIEAALRELEAEGVKLELALR--R      | 958  |
| EHBP1 <sub>1047-1220</sub>   | 1047 | GHMKAATETQRPSEDEVLNKGFKDTSQYVVGELAALENEQKQIDTRAALVEKRLRYLM    | 1103 |
| EHBP1L1 <sub>1340-1509</sub> | 1340 | GHMSE---EPPSPSGEEAGLQR-FQDTSQYVCAELQALQEQRQIDGRAAEVEMQLRSLM   | 1392 |

-----<XXXXXXXXXXXXXXXXX α-helix 2 XXXXXXXXXXXXXXXXXXXX>-----

|                              |      |                                                             |      |
|------------------------------|------|-------------------------------------------------------------|------|
| MicalcL <sub>525-695</sub>   | 575  | EADSGTQDEAQLLQEWFKLVLEKNKLMRYESELLIMAQELELEDHQSRLEQKLEKMLKE | 634  |
| MicalcL <sub>534-683</sub>   | 575  | EADSGTQDEAQLLQEWFKLVLEKNKLMRYESELLIMAQELELEDHQSRLEQKLEKMLKE | 634  |
| Mical3 <sub>1841-1990</sub>  | 1882 | EAGMGKKDDPKLMQEWFKLVQEKNAMVRYEELMIFARELELEDQRSRLQQLERERMAVE | 1941 |
| Mical1 <sub>918-1067</sub>   | 959  | QSSSPEQQKKLWVGQLQLVLDKNSLVAEEAELMITVQELNLEKQWQLDQELRGYMNRE  | 1018 |
| EHBP1 <sub>1047-1220</sub>   | 1104 | DTGRNTEEEAEMMQEWFMVLVKNKALIRRMNQLSLEKEHDLERRYELLNRELRAMLAI  | 1163 |
| EHBP1L1 <sub>1340-1509</sub> | 1393 | ESGANKLQEEVLIQEWFTLVNKNALIRRDQLQLLMEQDLERRFELLSRELRAMLAI    | 1452 |

-----<XXXXXXXXXX α-helix 3 XXXXXXXXXXXX>-----

|                              |      |                                                               |      |
|------------------------------|------|---------------------------------------------------------------|------|
| MicalcL <sub>525-695</sub>   | 635  | ESQKDEKDLNEEQEVFTELMQVIEQRDKLVDSLEEQRIREKAEDQHFESFVFSRGCQLSR  | 694  |
| MicalcL <sub>534-683</sub>   | 635  | ESQKDEKDLNEEQEVFTELMQVIEQRDKLVDSLEEQRIREKAEDQHFES-----        | 683  |
| Mical3 <sub>1841-1990</sub>  | 1942 | DHLKTEEELSEKQILNEMLEVEQQRDSLVALLEEQRRLREREEDKDLEA-----        | 1990 |
| Mical1 <sub>918-1067</sub>   | 1019 | ENLKTAADRQAEQVLRKLVLDVNQRDALIRFQEERRLSELALGTGAQG-----         | 1067 |
| EHBP1 <sub>1047-1220</sub>   | 1164 | DWQKTEAQKRREQLLLDELVALVNKRDLVRDLDAQEKQAEEDDEHLERTLEQNKGK---   | 1220 |
| EHBP1L1 <sub>1340-1509</sub> | 1453 | DWQKTSAQQHREQLLLLEELVSLVNQRDELVRDLDHKERIALEEDERLERGLEQRRRK--- | 1509 |

|                              |   |     |
|------------------------------|---|-----|
| MicalcL <sub>525-695</sub>   | T | 695 |
| MicalcL <sub>534-683</sub>   | - |     |
| Mical3 <sub>1841-1990</sub>  | - |     |
| Mical1 <sub>918-1067</sub>   | - |     |
| EHBP1 <sub>1047-1220</sub>   | - |     |
| EHBP1L1 <sub>1340-1509</sub> | - |     |
