# Supplementary figures and images for: bMERB domains are bivalent Rab8 family effectors evolved by gene duplication
Source: eLife journal article supplement (doi:10.7554/elife.18675), 2016-08-23

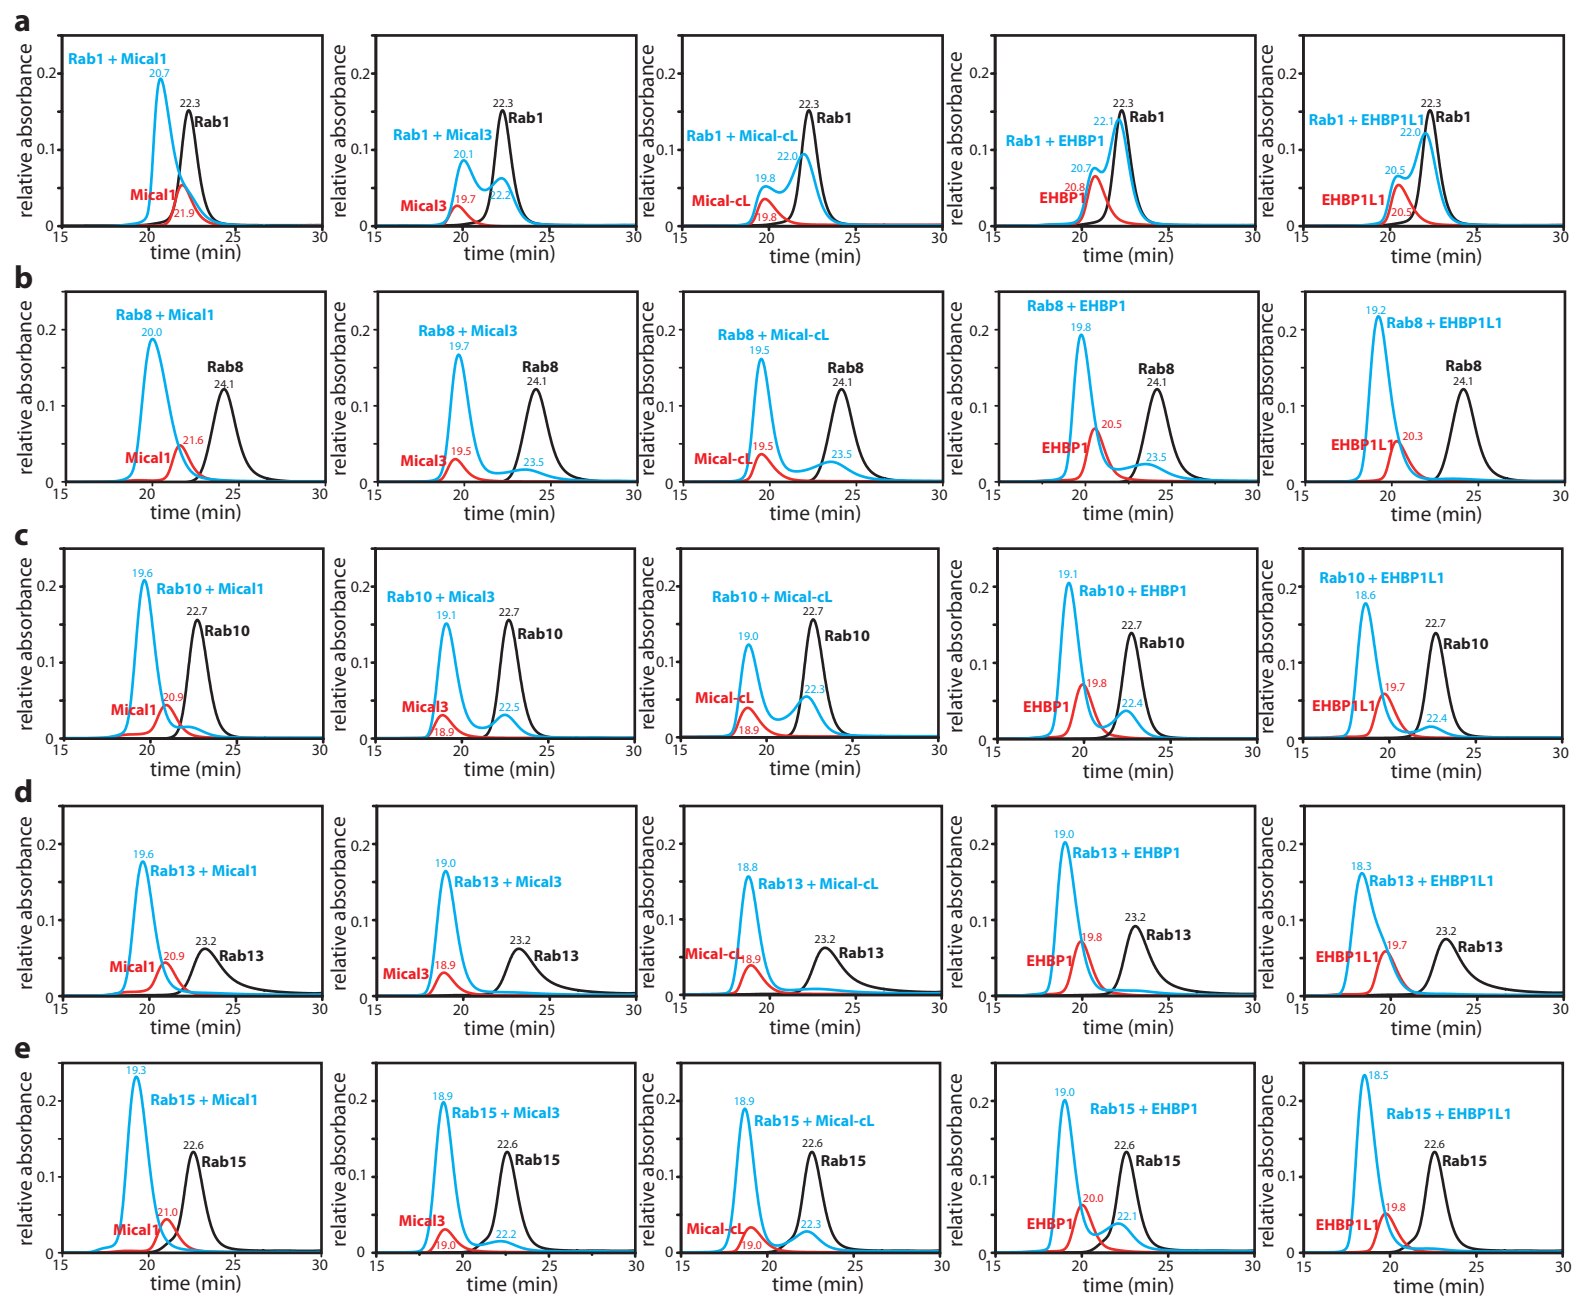

Supplement: supp [file elife_poa_e18675_Figure_2_figure_supplement_1.pdf › elife_poa_e18675_Figure_2_figure_supplement_1.pdf]

**a**

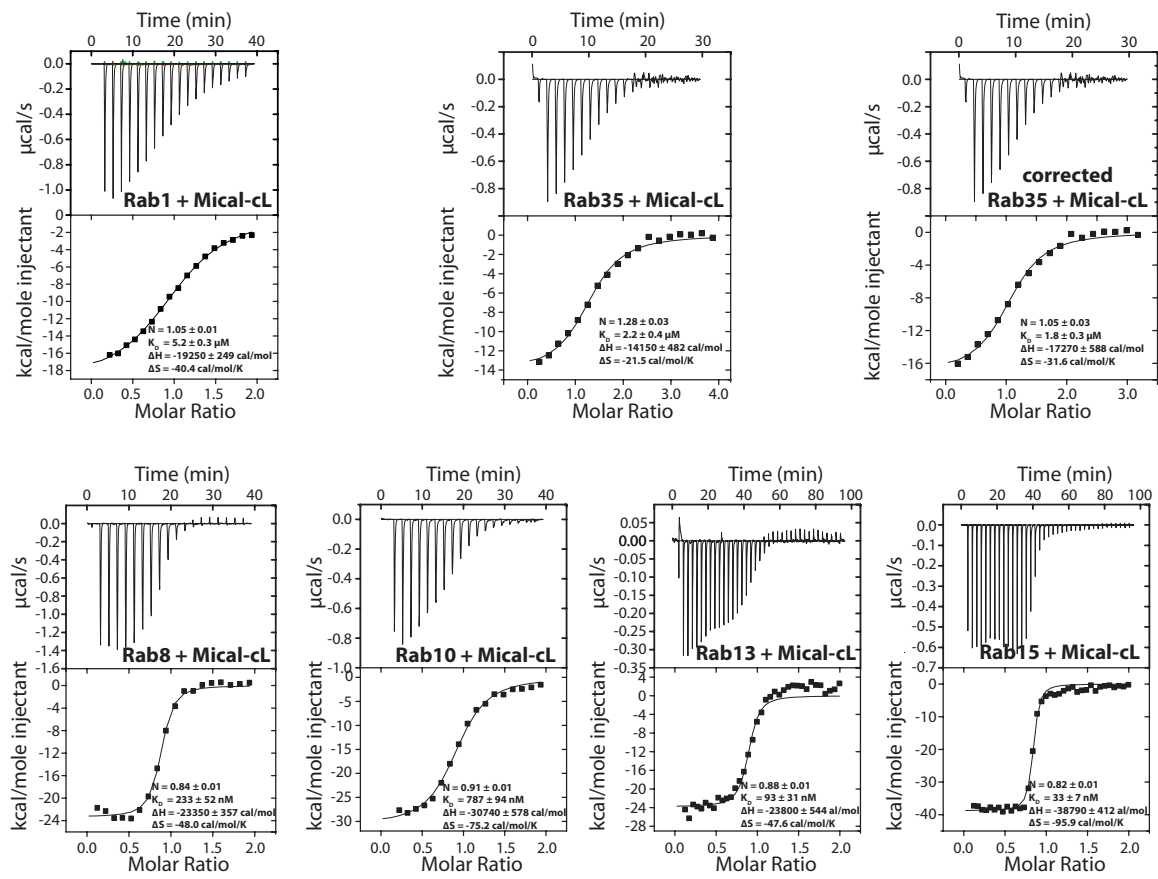

**b**

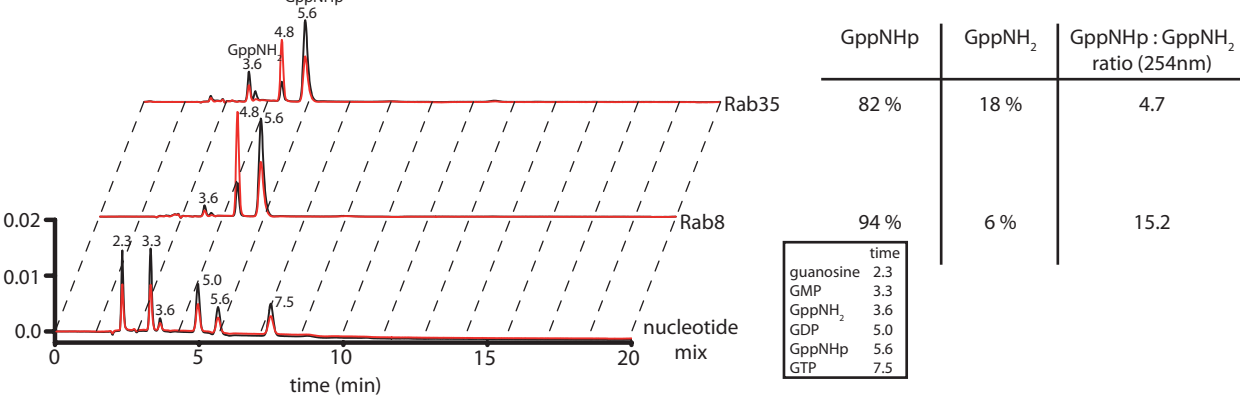

Supplement: supp [file elife_poa_e18675_Figure_2_figure_supplement_2.pdf › elife_poa_e18675_Figure_2_figure_supplement_2.pdf]

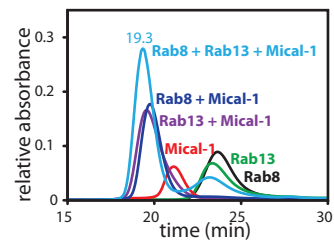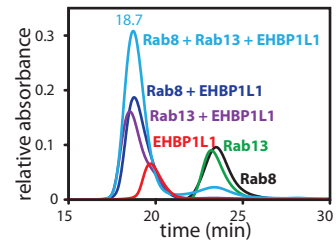

Supplement: supp [file elife_poa_e18675_Figure_2_figure_supplement_3.pdf › elife_poa_e18675_Figure_2_figure_supplement_3.pdf]

**a**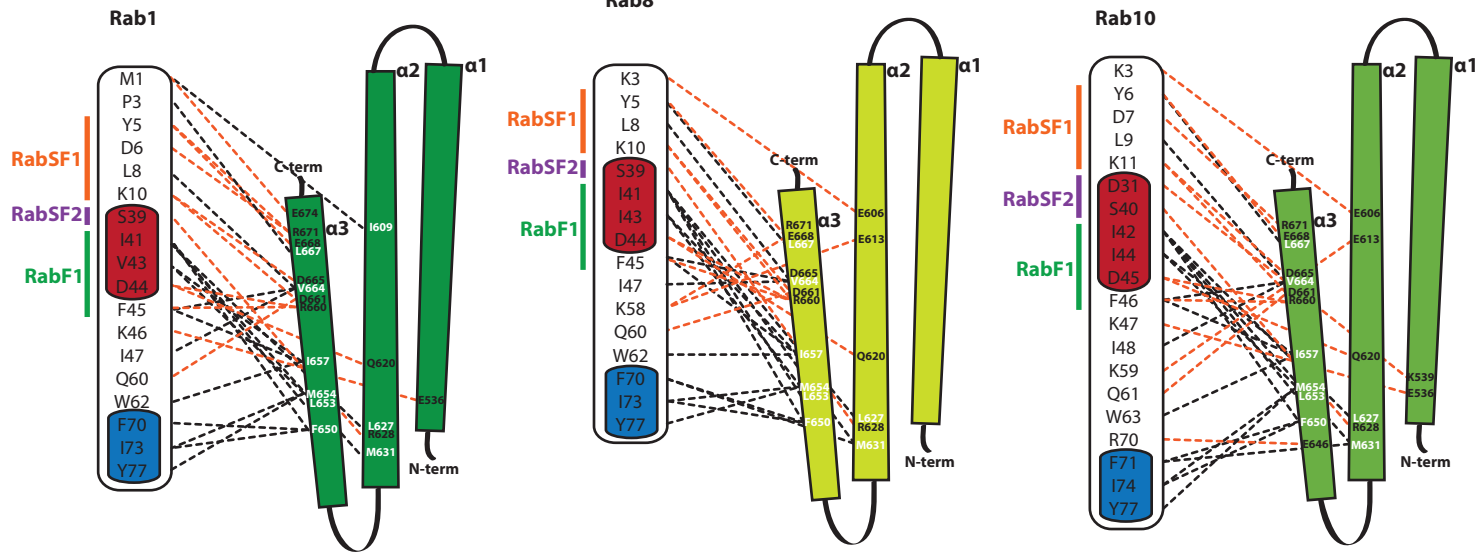**b**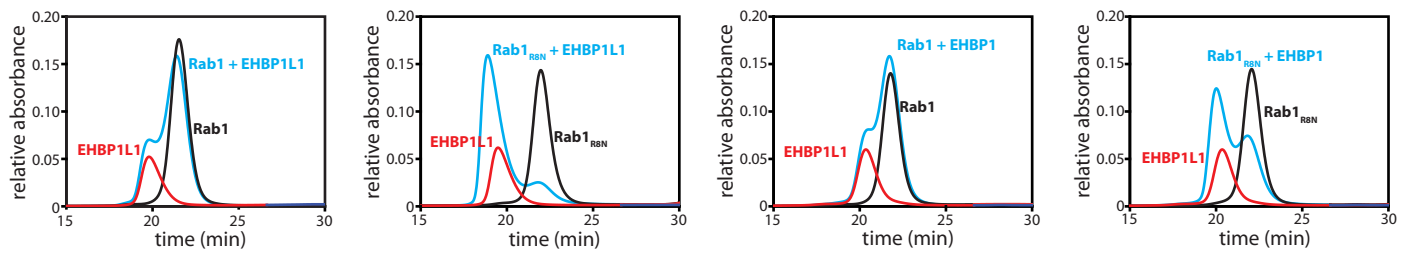

Supplement: supp [file elife_poa_e18675_Figure_5_figure_supplement_1.pdf › elife_poa_e18675_Figure_5_figure_supplement_1.pdf]

**Rab10:Mical-cL**

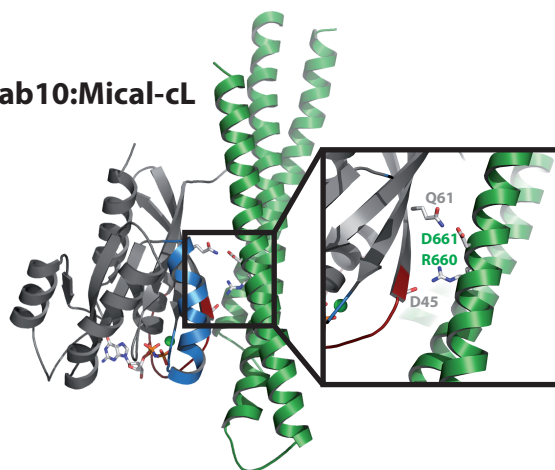

**Rab3:Rabphilin-3a**

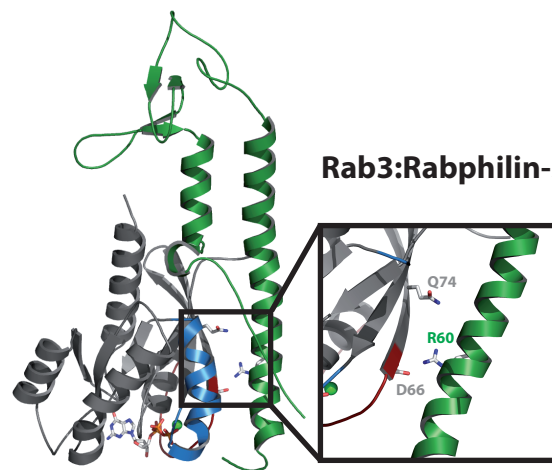

**Rab27:Slp2a**

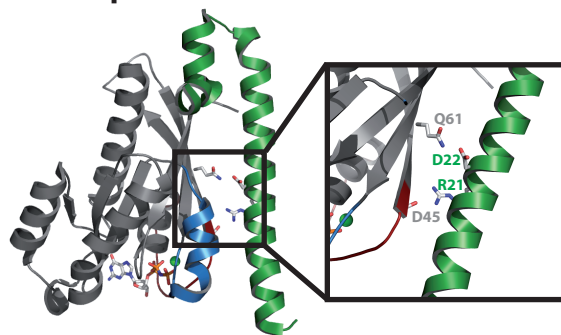

**Rab27:Slac2-a**

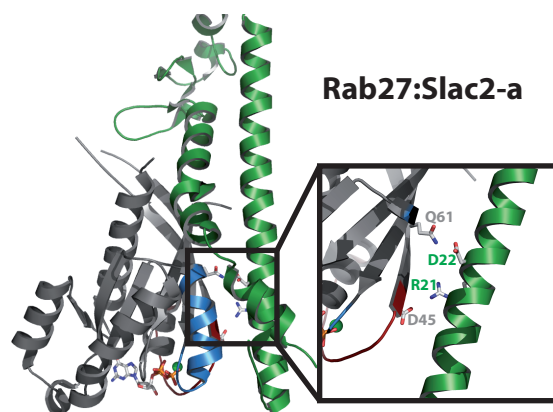

Supplement: supp [file elife_poa_e18675_Figure_5_figure_supplement_2.pdf › elife_poa_e18675_Figure_5_figure_supplement_2.pdf]

**a**

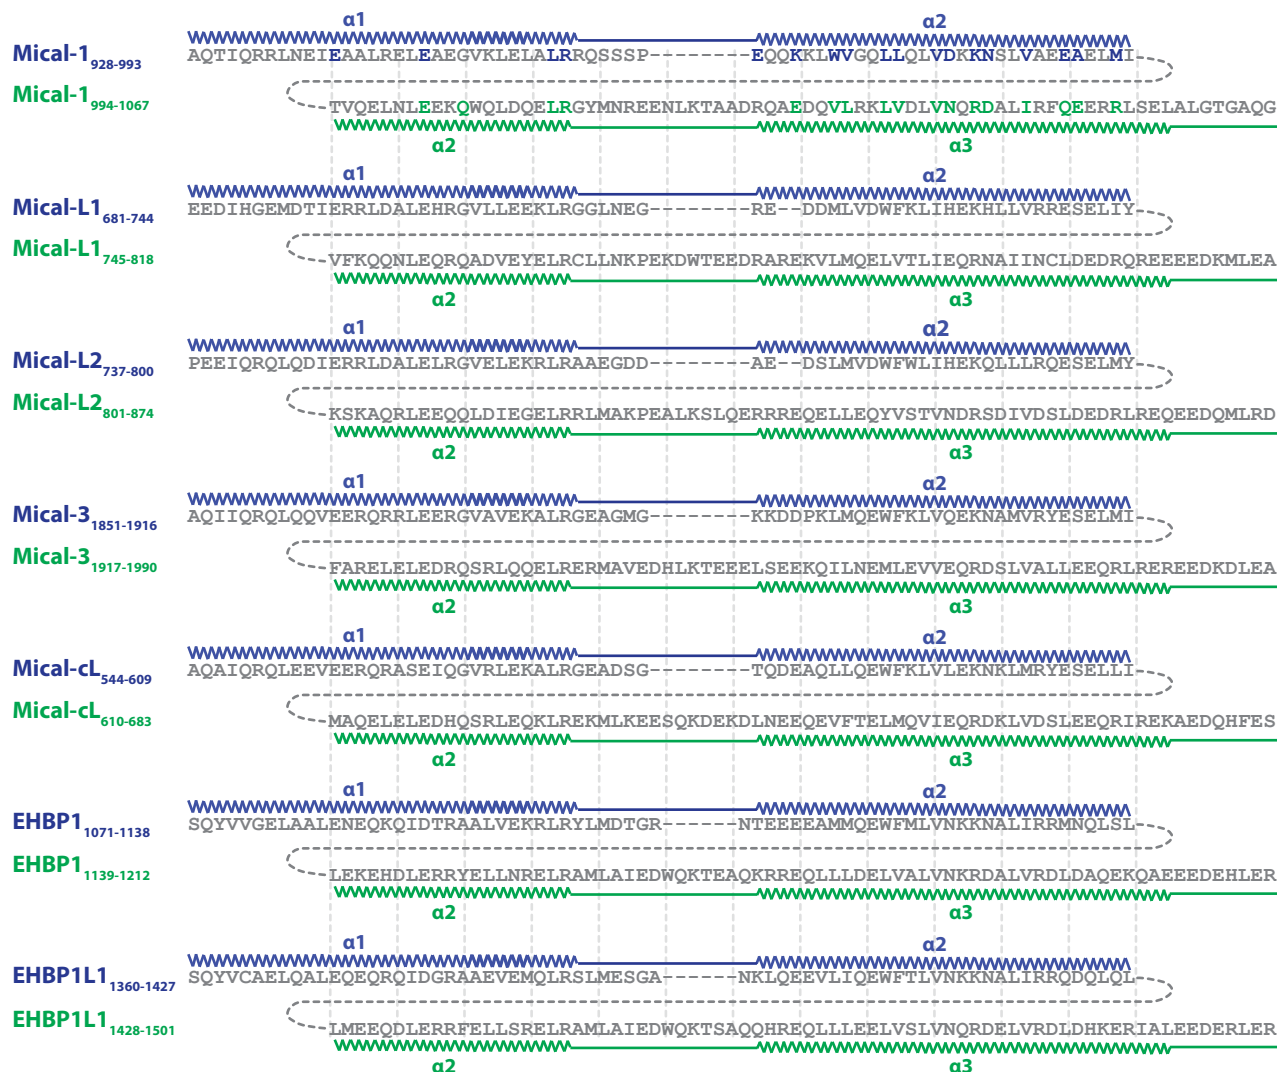

**b**

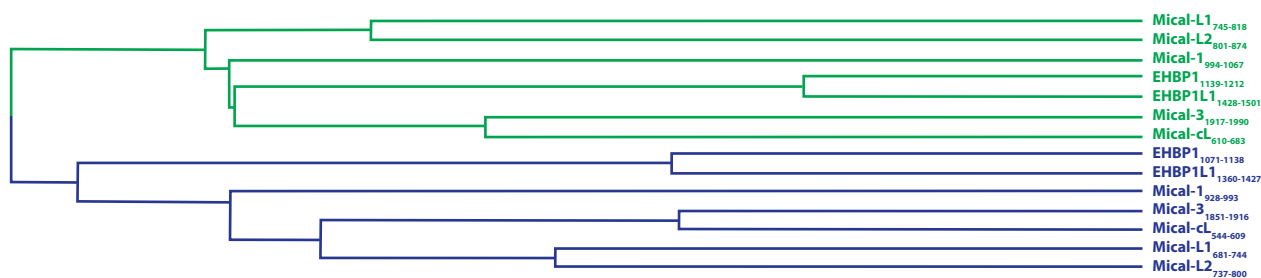

Supplement: supp [file elife_poa_e18675_Figure_6_figure_supplement_1.pdf › elife_poa_e18675_Figure_6_figure_supplement_1.pdf]

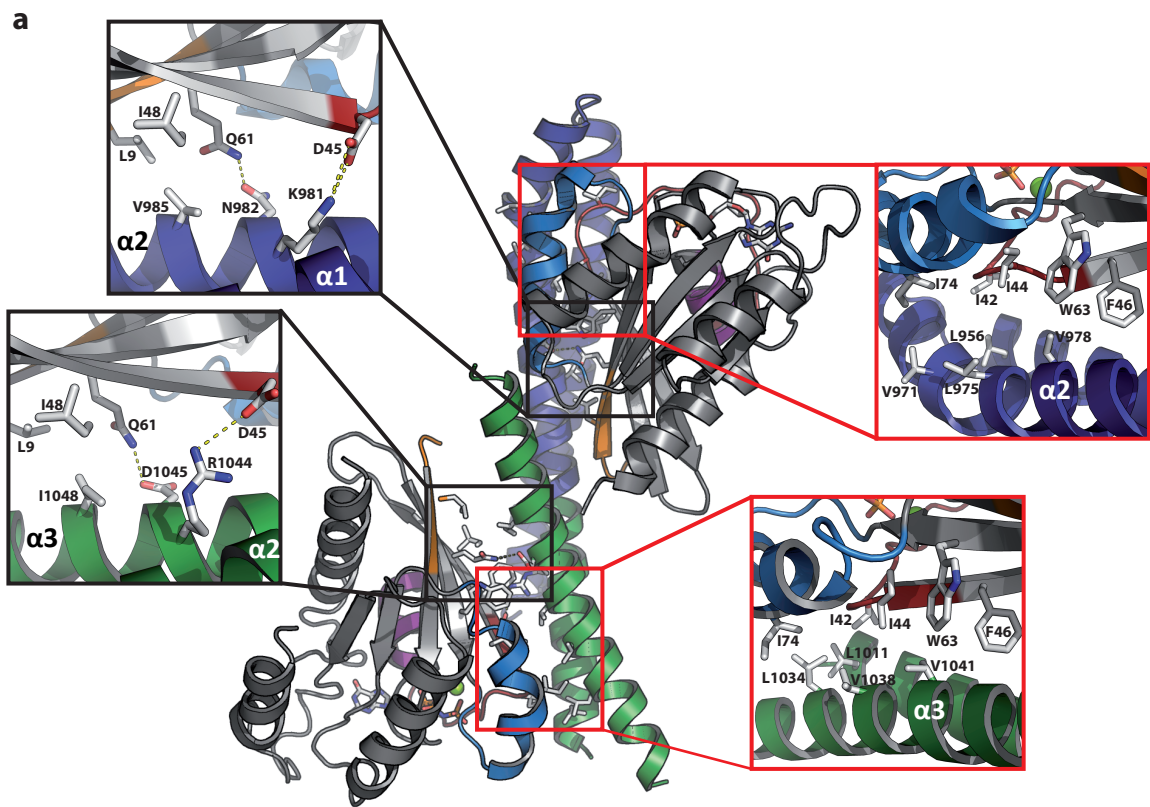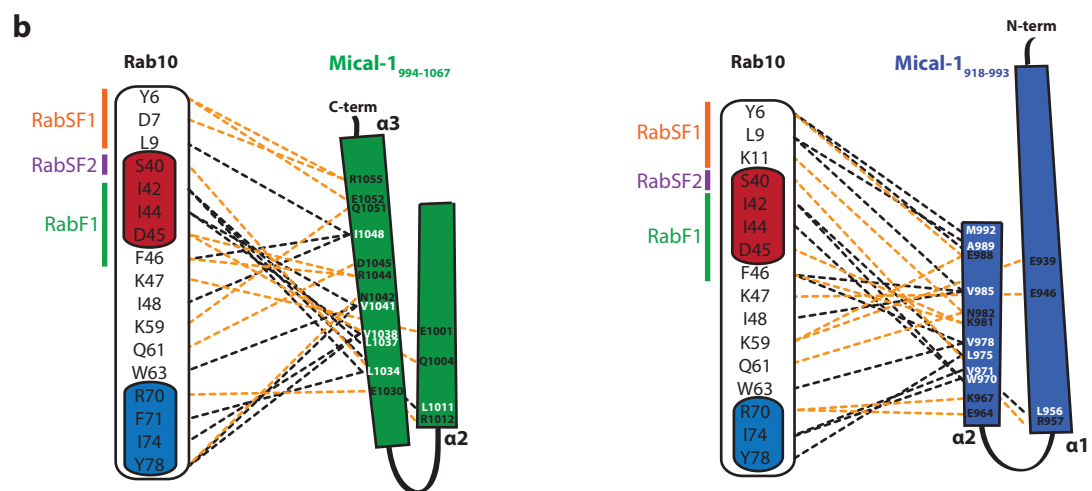

Supplement: supp [file elife_poa_e18675_Figure_6_figure_supplement_2.pdf › elife_poa_e18675_Figure_6_figure_supplement_2.pdf]
